# Supplementary material for: Gene Regulation Analysis Reveals Perturbations of Autism Spectrum Disorder during Neural System Development
Source: MDPI journal article supplement (doi:10.3390/genes12121901), 2021-11-27
Supplement: s1 [file s1]

# Supplementary Material

## Supplementary Figures and Tables

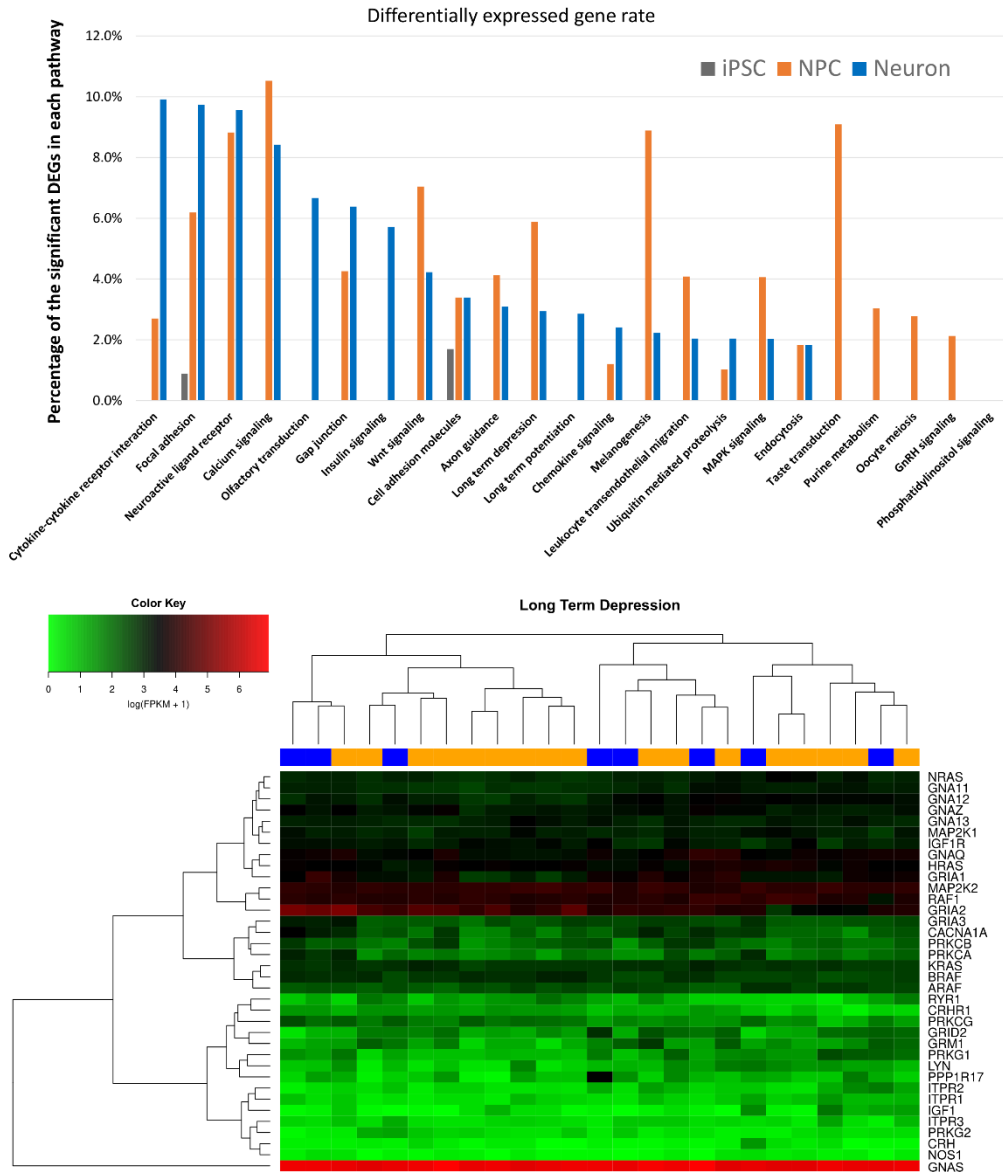

We examined the expression levels of the long-term depression pathway member genes, which were identified to be significantly related to ASD and schizophrenia. The expression levels of the 36 highly-expressed member genes of this pathway were consistent (no DE) across the ASD- and ASD+ samples.

**Supplementary Figure S1.** (A) The differentially expressed gene rates of the reported ASD-associated KEGG pathways of the three cell types. (B) The expression levels of the gene members of the long-term depression pathway in the neuron cells of the normal(blue) and ASD (gold) cases.

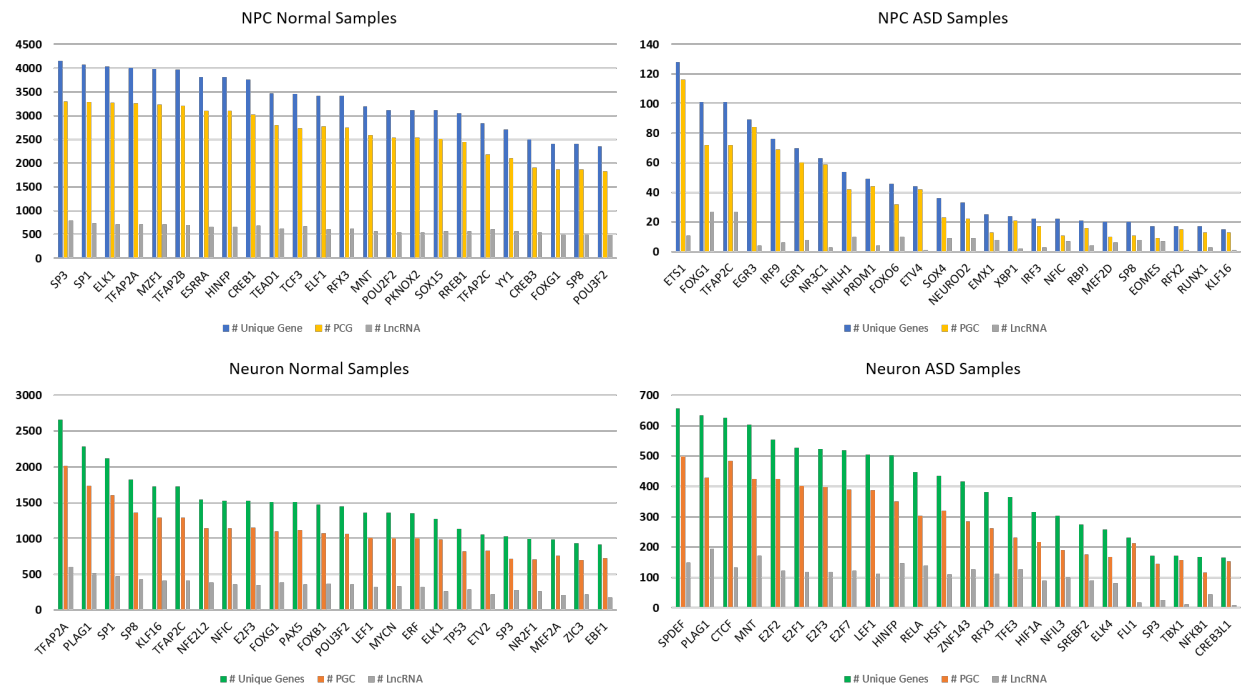

**Supplementary Figure S2.** The size of regulatory cascades for normal and ASD in NPC and neural cells.

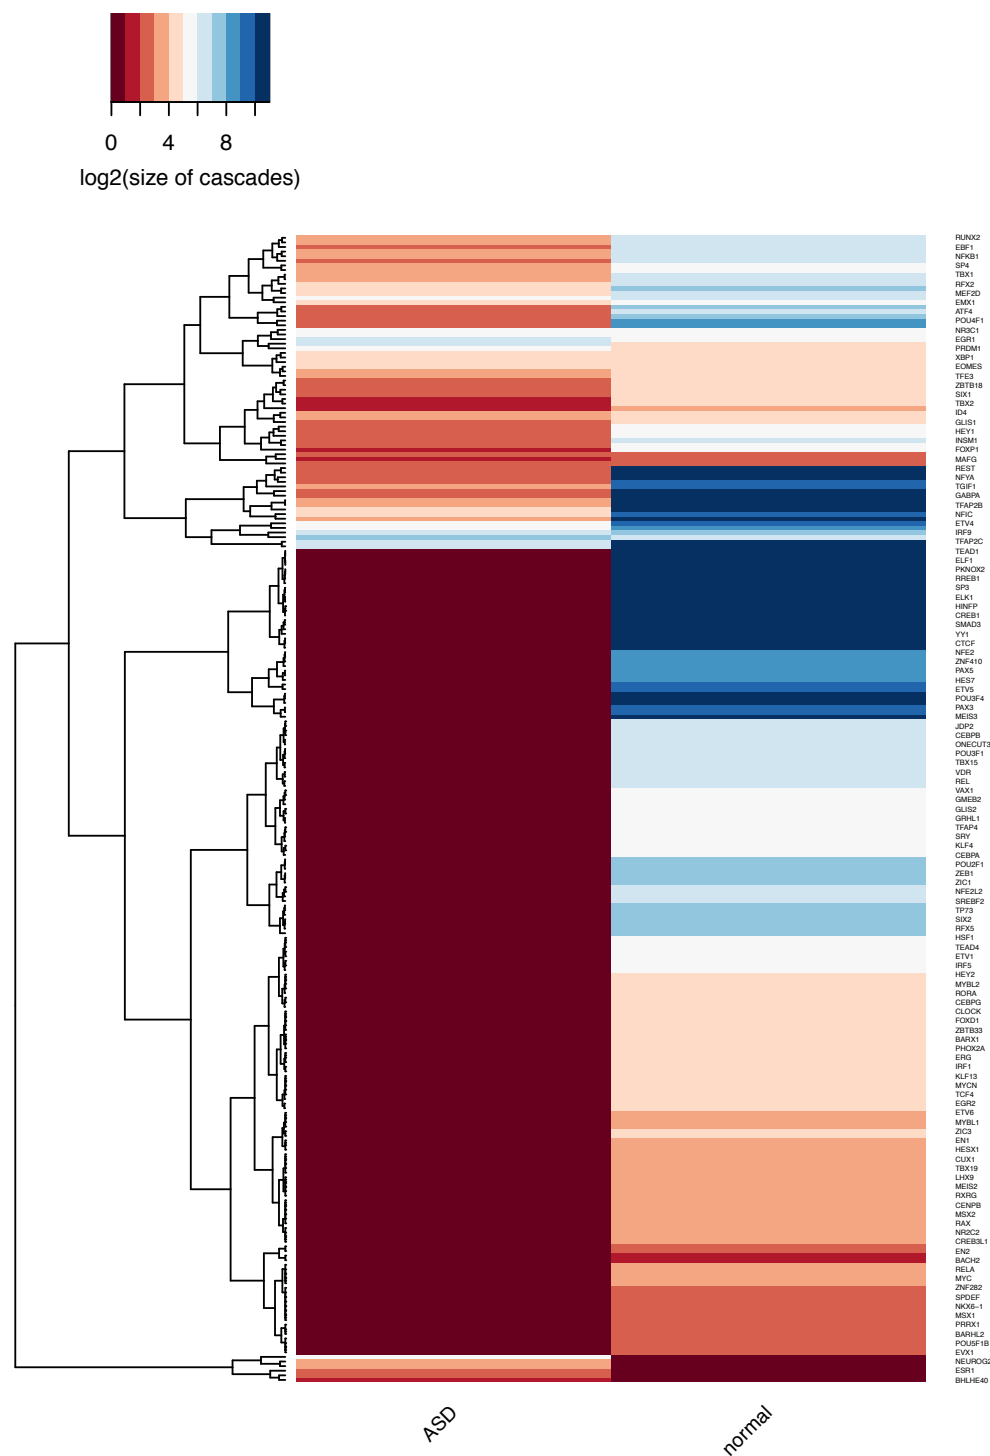

**Supplementary Figure S3.** The hierarchy clusters of the sizes of regulatory cascades for normal and ASD in the NPC stage. The color refers to the log2( size of a regulatory cascade), and the dark red represents the regulatory cascade lost in ASD.

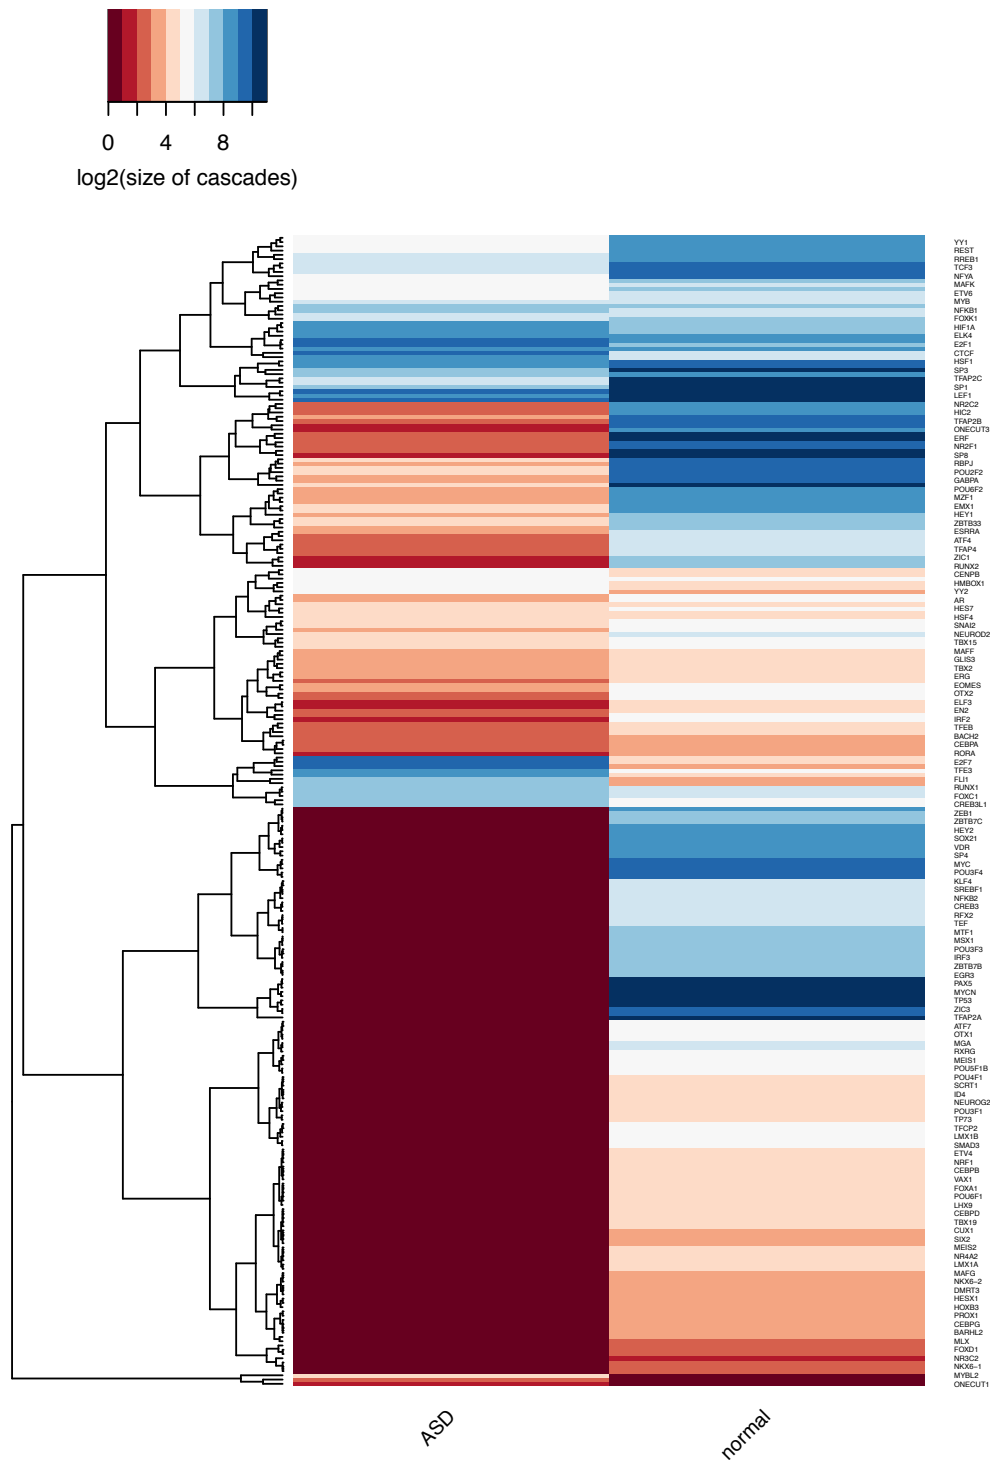

**Supplementary Figure S4.** The hierarchy clusters of the sizes of regulatory cascades for normal and ASD in the neural cells. The color refers to the  $\log_2(\text{size of a regulatory cascade})$ , and the dark red represents the regulatory cascade lost in ASD.



**Table S1.** List of the differentially expressed lncRNAs in ASD samples of the three cell types.

| iPSC            | Name          | Type          | logFC    | p-Value  | FDR      |
|-----------------|---------------|---------------|----------|----------|----------|
| ENSG00000248587 | GDNF-AS1      | antisense_RNA | 1.593235 | 2.65E-08 | 4.98E-05 |
| ENSG00000234665 | AL512625.3    | lincRNA       | -1.18237 | 1.98E-05 | 0.017664 |
| ENSG00000231107 | LINC01508     | lincRNA       | 1.604464 | 2.44E-05 | 0.01877  |
| ENSG00000230148 | HOXB-AS1      | antisense_RNA | 1.609512 | 8.45E-05 | 0.049377 |
| NPC             | Name          | Type          | logFC    | p-Value  | FDR      |
| ENSG00000244342 | LINC00698     | lincRNA       | 3.120872 | 7.70E-23 | 1.00E-19 |
| ENSG00000234165 | AC114877.1    | lincRNA       | 2.367867 | 6.58E-16 | 3.28E-13 |
| ENSG00000198547 | C20orf203     | lincRNA       | -1.73545 | 9.37E-13 | 3.11E-10 |
| ENSG00000280780 | JAKMIP2-AS1   | antisense_RNA | 1.988689 | 2.50E-12 | 7.43E-10 |
| ENSG00000263571 | AC004147.2    | lincRNA       | -1.70241 | 9.01E-12 | 2.50E-09 |
| ENSG00000174403 | C20orf166-AS1 | antisense_RNA | -1.66264 | 1.99E-11 | 5.19E-09 |
| ENSG00000122548 | KIAA0087      | lincRNA       | -1.64027 | 5.80E-11 | 1.43E-08 |
| ENSG00000269993 | KC877982.1    | lincRNA       | 1.815332 | 5.31E-10 | 1.06E-07 |
| ENSG00000273771 | AC024337.2    | lincRNA       | -1.49115 | 1.05E-09 | 1.98E-07 |
| ENSG00000206532 | AC117402.1    | lincRNA       | -1.44737 | 1.60E-09 | 2.88E-07 |
| ENSG00000249464 | LINC01091     | lincRNA       | 1.562842 | 3.59E-08 | 4.95E-06 |
| ENSG00000224969 | AL645608.2    | antisense_RNA | -1.35491 | 4.91E-08 | 6.56E-06 |
| ENSG00000250616 | AC012645.1    | antisense_RNA | -1.26579 | 1.79E-07 | 1.97E-05 |
| ENSG00000225472 | AL136366.1    | antisense_RNA | 1.436728 | 3.39E-07 | 3.44E-05 |
| ENSG00000253982 | AC100810.1    | antisense_RNA | -1.22235 | 1.28E-06 | 0.000108 |
| ENSG00000260719 | AC009133.3    | antisense_RNA | 1.405385 | 2.27E-06 | 0.00018  |
| ENSG00000229847 | EMX2OS        | antisense_RNA | 1.254132 | 3.01E-06 | 0.000232 |
| ENSG00000249937 | LINC02223     | lincRNA       | -1.1622  | 4.08E-06 | 0.000302 |
| ENSG00000250742 | LINC02381     | lincRNA       | -1.09098 | 5.24E-06 | 0.00038  |
| ENSG00000250986 | AC141928.1    | lincRNA       | 1.29022  | 5.25E-06 | 0.00038  |
| ENSG00000235597 | LINC01102     | lincRNA       | -1.09494 | 5.65E-06 | 0.000406 |
| ENSG00000231638 | LUARIS        | antisense_RNA | 1.345416 | 6.16E-06 | 0.000435 |
| ENSG00000245904 | AC025164.2    | antisense_RNA | -1.09411 | 6.42E-06 | 0.00045  |
| ENSG00000231721 | LINC-PINT     | antisense_RNA | -1.10963 | 8.98E-06 | 0.000604 |
| ENSG00000261136 | AC023908.3    | antisense_RNA | -1.04124 | 1.42E-05 | 0.000913 |
| ENSG00000274021 | AC024909.3    | lincRNA       | 1.188693 | 1.53E-05 | 0.000965 |
| ENSG00000236404 | VLDLR-AS1     | antisense_RNA | -1.04328 | 1.56E-05 | 0.000977 |
| ENSG00000281881 | SPRY4-IT1     | lincRNA       | 1.189477 | 1.62E-05 | 0.001    |
| ENSG00000274184 | AC011815.2    | lincRNA       | -1.0815  | 1.64E-05 | 0.001006 |
| ENSG00000230630 | DNM3OS        | antisense_RNA | -1.00848 | 2.53E-05 | 0.001486 |
| ENSG00000270332 | SMC2-AS1      | lincRNA       | -1.05136 | 5.48E-05 | 0.002832 |
| ENSG00000229153 | EPHA1-AS1     | antisense_RNA | -1.19159 | 5.56E-05 | 0.002865 |
| ENSG00000263958 | AC091138.1    | lincRNA       | -1.02452 | 5.66E-05 | 0.002906 |
| ENSG00000239911 | PRKAG2-AS1    | antisense_RNA | -1.1159  | 6.05E-05 | 0.00309  |
| ENSG00000245067 | IGFBP7-AS1    | antisense_RNA | 1.122918 | 6.59E-05 | 0.003316 |

| ENSG00000215808 | LINC01139   | lincRNA       | -1.01643 | 7.20E-05 | 0.003556 |
|-----------------|-------------|---------------|----------|----------|----------|
| ENSG00000280707 | AL353747.4  | lincRNA       | 1.056588 | 0.000101 | 0.004678 |
| ENSG00000224729 | PCOLCE-AS1  | antisense_RNA | -1.0042  | 0.000107 | 0.004862 |
| ENSG00000224635 | AL391095.1  | lincRNA       | 1.039621 | 0.000134 | 0.005849 |
| ENSG00000197182 | MIRLET7BHG  | lincRNA       | 1.119983 | 0.000228 | 0.008923 |
| ENSG00000234614 | AL450992.2  | antisense_RNA | 1.191283 | 0.000621 | 0.019451 |
| ENSG00000284708 | AL031731.1  | antisense_RNA | -1.0411  | 0.000678 | 0.021049 |
| Neuron          | Name        | Type          | logFC    | p-Value  | FDR      |
| ENSG00000230630 | DNM3OS      | antisense_RNA | 3.250921 | 9.63E-22 | 1.36E-18 |
| ENSG00000278041 | AL133325.3  | lincRNA       | -2.70107 | 5.33E-21 | 5.65E-18 |
| ENSG00000280623 | PCAT14      | lincRNA       | -2.04474 | 1.31E-13 | 4.02E-11 |
| ENSG00000215808 | LINC01139   | lincRNA       | -1.82521 | 4.57E-11 | 9.23E-09 |
| ENSG00000213468 | FIRRE       | lincRNA       | -1.77078 | 7.51E-11 | 1.46E-08 |
| ENSG00000249669 | CARMN       | lincRNA       | 1.889543 | 2.27E-09 | 3.44E-07 |
| ENSG00000223749 | MIR503HG    | lincRNA       | 1.799372 | 9.47E-09 | 1.33E-06 |
| ENSG00000259485 | LINC02253   | lincRNA       | 1.855742 | 6.59E-08 | 7.45E-06 |
| ENSG00000177406 | AC021054.1  | antisense_RNA | -1.64861 | 1.27E-07 | 1.35E-05 |
| ENSG00000259370 | AC103740.1  | antisense_RNA | 1.627037 | 1.77E-07 | 1.81E-05 |
| ENSG00000266903 | AC243964.2  | antisense_RNA | -1.62902 | 1.96E-07 | 1.95E-05 |
| ENSG00000267313 | KC6         | lincRNA       | 1.523084 | 6.09E-07 | 5.43E-05 |
| ENSG00000266709 | AC005224.4  | lincRNA       | 1.487361 | 1.07E-06 | 8.96E-05 |
| ENSG00000221819 | GAS8-AS1    | antisense_RNA | -1.35386 | 1.74E-06 | 0.000136 |
| ENSG00000245067 | IGFBP7-AS1  | antisense_RNA | -1.24355 | 5.16E-06 | 0.000347 |
| ENSG00000277954 | AC092376.2  | antisense_RNA | -1.19296 | 9.85E-06 | 0.000616 |
| ENSG00000267506 | AC021683.2  | lincRNA       | -1.29337 | 1.26E-05 | 0.000766 |
| ENSG00000267530 | LINC01836   | lincRNA       | -1.47    | 2.36E-05 | 0.001339 |
| ENSG00000184809 | B3GALT5-AS1 | antisense_RNA | -1.13926 | 2.96E-05 | 0.001634 |
| ENSG00000267466 | AC021683.1  | lincRNA       | -1.23669 | 3.57E-05 | 0.001928 |
| ENSG00000258545 | RHOXF1-AS1  | antisense_RNA | -1.12928 | 4.85E-05 | 0.002493 |
| ENSG00000186960 | LINC01551   | lincRNA       | -1.0809  | 6.11E-05 | 0.003055 |
| ENSG00000250358 | LINC02200   | lincRNA       | -1.10768 | 6.44E-05 | 0.003186 |
| ENSG00000277013 | AC008556.1  | lincRNA       | -1.27929 | 9.64E-05 | 0.004454 |
| ENSG00000247157 | LINC01252   | lincRNA       | -1.07639 | 9.67E-05 | 0.004454 |
| ENSG00000261488 | AC128688.2  | antisense_RNA | -1.15373 | 0.000101 | 0.004639 |
| ENSG00000177133 | LINC00982   | antisense_RNA | -1.04794 | 0.000104 | 0.00472  |
| ENSG00000226476 | LINC01748   | lincRNA       | -1.04763 | 0.00012  | 0.005359 |
| ENSG00000232229 | LINC00865   | lincRNA       | -1.21609 | 0.000147 | 0.006395 |
| ENSG00000226702 | MIR217HG    | lincRNA       | 1.182371 | 0.000151 | 0.006556 |
| ENSG00000231977 | AL096828.1  | lincRNA       | 1.232663 | 0.000233 | 0.00938  |

**Table S2.** The numbers of reference regulations in fetal brain that were confirmed by gene expression correlation.

|                                            |               |            |         |
|--------------------------------------------|---------------|------------|---------|
| <b>Correlation cutoff = 0.75 (PCGs)</b>    | Normal sample | ASD sample | Overlap |
| iPSC                                       | 8,733         | 22,842     | 1,136   |
| NPC                                        | 19,426        | 2,336      | 538     |
| neuron                                     | 17,619        | 7,928      | 1,465   |
| <b>Correlation cutoff = 0.75 (lncRNAs)</b> | Normal sample | ASD sample | Overlap |
| iPSC                                       | 3,944         | 3,967      | 200     |
| NPC                                        | 8,110         | 573        | 110     |
| neuron                                     | 8,031         | 2756       | 457     |



**Table S3.** The TFs that lost the interactions with their target genes in the ASD samples.

| TF lost in ASD (NPC) | Number of genes | Number of protein-coding genes | Pathways                              | FDR      |
|----------------------|-----------------|--------------------------------|---------------------------------------|----------|
| CREB1                | 3756            | 3023                           | Parkinson disease                     | 3.33E-03 |
|                      |                 |                                | Huntington disease                    | 2.85E-03 |
| CREB3                | 2494            | 1909                           | Parkinson disease                     | 1.37E-05 |
|                      |                 |                                | Ras Pathway                           | 9.25E-04 |
|                      |                 |                                | Huntington disease                    | 7.51E-05 |
| CTCF                 | 2120            | 1660                           | Ubiquitin proteasome pathway          | 2.73E-02 |
|                      |                 |                                | Parkinson disease                     | 2.35E-02 |
|                      |                 |                                | Huntington disease                    | 3.30E-03 |
|                      |                 |                                | EGF receptor signaling pathway        | 4.76E-02 |
| ELF1                 | 3419            | 2776                           | Parkinson disease                     | 5.73E-03 |
|                      |                 |                                | Huntington disease                    | 8.37E-04 |
| ELK1                 | 4032            | 3268                           | Parkinson disease                     | 5.47E-03 |
|                      |                 |                                | Cytoskeletal regulation by Rho GTPase | 4.94E-02 |
|                      |                 |                                | Huntington disease                    | 5.41E-03 |
| ESRRA                | 3817            | 3106                           | Parkinson disease                     | 1.15E-02 |
|                      |                 |                                | Cytoskeletal regulation by Rho GTPase | 3.95E-02 |
|                      |                 |                                | Huntington disease                    | 8.71E-03 |
| HIF1A                | 2146            | 1685                           | Ubiquitin proteasome pathway          | 3.15E-02 |
|                      |                 |                                | Parkinson disease                     | 2.66E-02 |
|                      |                 |                                | Huntington disease                    | 3.78E-03 |
| HINFP                | 3817            | 3106                           | Cytoskeletal regulation by Rho GTPase | 3.95E-02 |
|                      |                 |                                | Parkinson disease                     | 1.15E-02 |
|                      |                 |                                | Huntington disease                    | 8.71E-03 |
| MEIS3                | 1050            | 737                            | N/A                                   |          |

|        |      |      |                                                 |          |
|--------|------|------|-------------------------------------------------|----------|
| MNT    | 3188 | 2588 | Parkinson disease                               | 4.58E-02 |
|        |      |      | Huntington disease                              | 5.33E-03 |
| MZF1   | 3988 | 3230 | Cytoskeletal regulation by Rho GTPase           | 4.66E-02 |
|        |      |      | Parkinson disease                               | 9.29E-03 |
|        |      |      | Huntington disease                              | 7.17E-03 |
| NRF1   | 1424 | 1126 | Ubiquitin proteasome pathway                    | 4.99E-03 |
|        |      |      | p53 pathway                                     | 1.84E-02 |
|        |      |      | Huntington disease                              | 2.56E-03 |
| PKNOX2 | 3116 | 2538 | Parkinson disease                               | 1.44E-02 |
|        |      |      | Huntington disease                              | 1.83E-02 |
| POU3F2 | 2359 | 1835 | EGF receptor signaling pathway                  | 4.08E-02 |
|        |      |      | Huntington disease                              | 4.44E-02 |
|        |      |      | Gonadotropin-releasing hormone receptor pathway | 6.17E-02 |
| POU3F4 | 1357 | 995  | Huntington disease                              | 7.19E-03 |
| RFX3   | 3412 | 2750 | Parkinson disease                               | 1.42E-02 |
|        |      |      | Huntington disease                              | 1.98E-02 |
| RREB1  | 3056 | 2446 | Parkinson disease                               | 1.16E-02 |
|        |      |      | Huntington disease                              | 1.21E-03 |
| SMAD3  | 2298 | 1877 | Huntington disease                              | 2.74E-02 |
| SOX15  | 3110 | 2509 | p53 pathway feedback loops 2                    | 5.02E-02 |
|        |      |      | p53 pathway                                     | 4.25E-02 |
|        |      |      | Parkinson disease                               | 1.29E-02 |
|        |      |      | Huntington disease                              | 1.10E-02 |
| SP1    | 4077 | 3282 | Parkinson disease                               | 5.54E-03 |
|        |      |      | Cytoskeletal regulation by Rho GTPase           | 2.07E-02 |
|        |      |      | Huntington disease                              | 5.58E-03 |
| SP3    | 4151 | 3302 | Parkinson disease                               | 5.79E-03 |

|       |      |      |                                                       |          |
|-------|------|------|-------------------------------------------------------|----------|
|       |      |      | Cytoskeletal regulation by Rho GTPase                 | 3.23E-02 |
|       |      |      | Huntington disease                                    | 8.41E-03 |
| TCF3  | 3457 | 2735 | Parkinson disease                                     | 1.33E-02 |
|       |      |      | Huntington disease                                    | 2.02E-02 |
| TEAD1 | 3469 | 2803 | Parkinson disease                                     | 1.62E-02 |
|       |      |      | Huntington disease                                    | 9.43E-04 |
| TFCP2 | 1387 | 1089 | Ubiquitin proteasome pathway                          | 1.75E-03 |
|       |      |      | p53 pathway                                           | 1.30E-02 |
|       |      |      | Huntington disease                                    | 3.08E-03 |
| YY1   | 2713 | 2110 | Parkinson disease                                     | 5.34E-03 |
|       |      |      | Ras Pathway                                           | 3.83E-02 |
|       |      |      | Huntington disease                                    | 3.09E-03 |
| YY2   | 2065 | 1625 | Heme biosynthesis                                     | 4.56E-02 |
|       |      |      | Ubiquitin proteasome pathway                          | 2.21E-02 |
|       |      |      | Transcription regulation by bZIP transcription factor | 2.65E-02 |
|       |      |      | Parkinson disease                                     | 4.11E-02 |
|       |      |      | p53 pathway                                           | 4.71E-02 |
|       |      |      | Huntington disease                                    | 9.84E-03 |
